# Supplementary material for: Growth of graphene with large single-crystal domains by Ni foam-assisted structure and its high-gain field-effect transistors
Source: Royal Society of Chemistry journal article supplement (doi:10.1039/c8na00203g), 2018-12-13
Supplement: c8na00203g1.pdf [file c8na00203g1.pdf]

## Supplementary Information

### Growth of graphene with large single crystal domain by Ni foam assistant structure and its high-gain field-effect transistors

Xue Dong Gao, Cui Yu\*, Ze Zhao He, Xu Bo Song, Qing Bin Liu, Chuang Jie Zhou, Jian Chao Guo, Shu Jun Cai, and Zhi Hong Feng\*

National Key Laboratory of Application Specific Integrated Circuit, Hebei Semiconductor Research Institute, Shijiazhuang 050051, Hebei Province, China.

Corresponding Author: yucui1@163.com; ga917vv@163.com

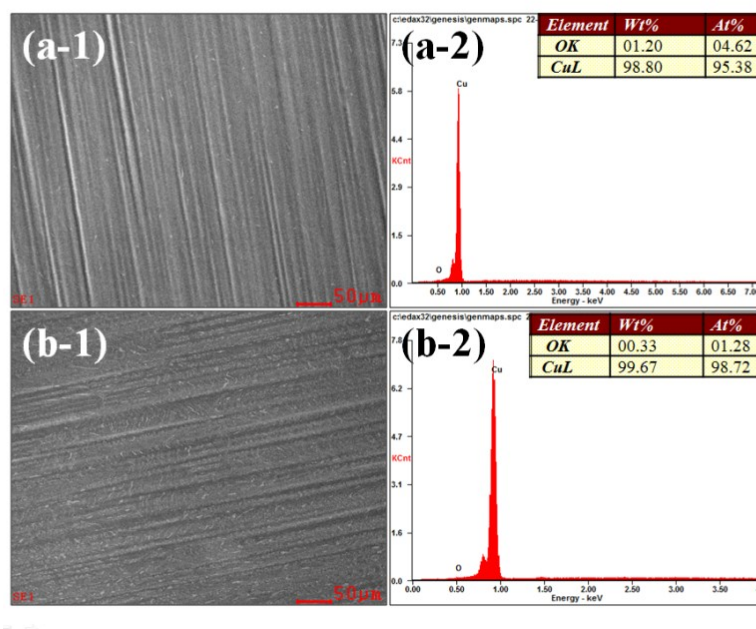

**Fig. S1** (a-1), (a-2) SEM and EDX of Cu foil with Ni foam assistant structure after heat treatment, the O atomic ratio on Cu surface is 4.62%; (b-1), (b-2) SEM and EDX of Cu foil without Ni foam assistant after heat treatment, the O atomic ratio on Cu surface is 1.28%.

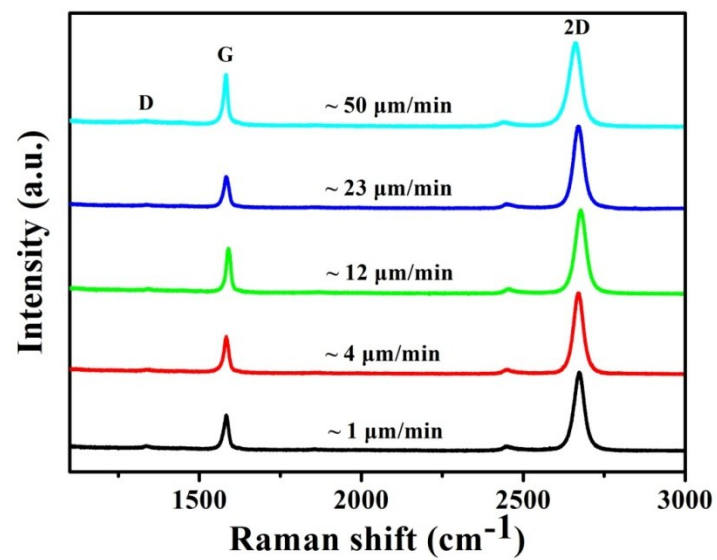

**Fig. S2** Raman shifts of graphene samples with different growth rates.

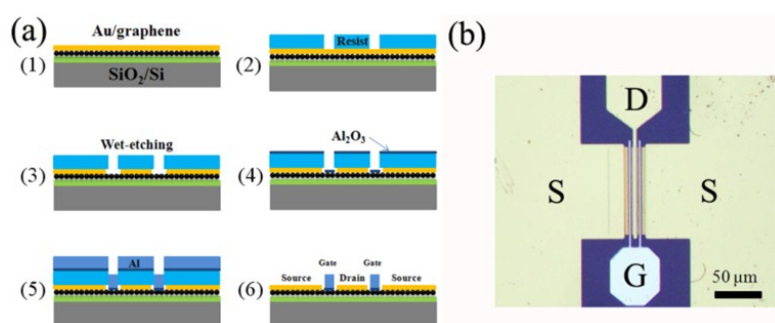

**Fig. S3** (a) Fabrication schedule, and (b) OM image of graphene FET.
